# Supplementary material
Source: PubMed Central journal article supplement (PMC7198390)
Supplement: jnm234906SupplementalData.pdf [file jnm234906SupplementalData.pdf]

**Supplemental table 1.** Performance of <sup>68</sup>Ga-PSMA-11 PET according to literature

| <b>Literature</b>   | <b>Sensitivity</b> | <b>Specificity</b> | <b>PPV</b> | <b>NPV</b> | <b>ACC</b> | <b>N=</b> |
|---------------------|--------------------|--------------------|------------|------------|------------|-----------|
| Hope et al 2018     | 74                 | 96                 | 93         | 85         | 86         | 266       |
| v. Eyben et al 2016 | 61                 | 97                 |            |            |            | 273       |
| Corfield et al 2018 | 33–92              | 64–91              | 83–96      | 80–96      |            | 216       |
| Perera et al 2016   | 86                 | 86                 |            |            |            | 239       |
| Our Results         | 72                 | 93                 | 74         | 93         | 93         | 58        |

**Supplemental table 2**

Diagnostic accuracy of <sup>18</sup>F-rhPSMA-7 PET and cross-sectional imaging compared with histology (template-based analysis) modified by data retrieved from follow up.

| Morphological Grading | Histology: LN metastasis |        |               |
|-----------------------|--------------------------|--------|---------------|
|                       | pos.                     | neg.   |               |
| 1†                    | 2                        | 3      | PPV:<br>28.6% |
| 2†                    | 0                        | 0      |               |
| 3†                    | 4                        | 12     |               |
| 4                     | 12                       | 24     | NPV:<br>86.4% |
| 5                     | 36                       | 282    |               |
| Total                 | 54                       | 321    | 375           |
|                       | Sens.:                   | Spec.: | Acc.:         |
|                       | 11.1%                    | 95.3%  | 83.2%         |

  

| <sup>18</sup> F-rhPSMA7-PET Grading | Histology: LN metastasis |        |               |
|-------------------------------------|--------------------------|--------|---------------|
|                                     | pos.                     | neg.   |               |
| 1*                                  | 26                       | 3      | PPV:<br>78.9% |
| 2*                                  | 4                        | 5      |               |
| 3                                   | 1                        | 10     | NPV:<br>92.9% |
| 4                                   | 2                        | 17     |               |
| 5                                   | 21                       | 286    |               |
| Total                               | 54                       | 321    | 375           |
|                                     | Sens.:                   | Spec.: | Acc.:         |
|                                     | 55.6%                    | 97.5%  | 91.4%         |

(pos.: positive; neg.: negative; Sens.: sensitivity; Spec.: specificity; PPV: positive predictive value; NPV: negative predictive value; Acc.: accuracy; LN: lymph nodes; †: values for Morphological grading: 1–3 positive (4–5 negative\*\*), \*: values for <sup>18</sup>F-rhPSMA-7 PET Grading: 1+2 positive (3–5: negative) for LN metastasis\*\*)

\*\* based on highest Youden index

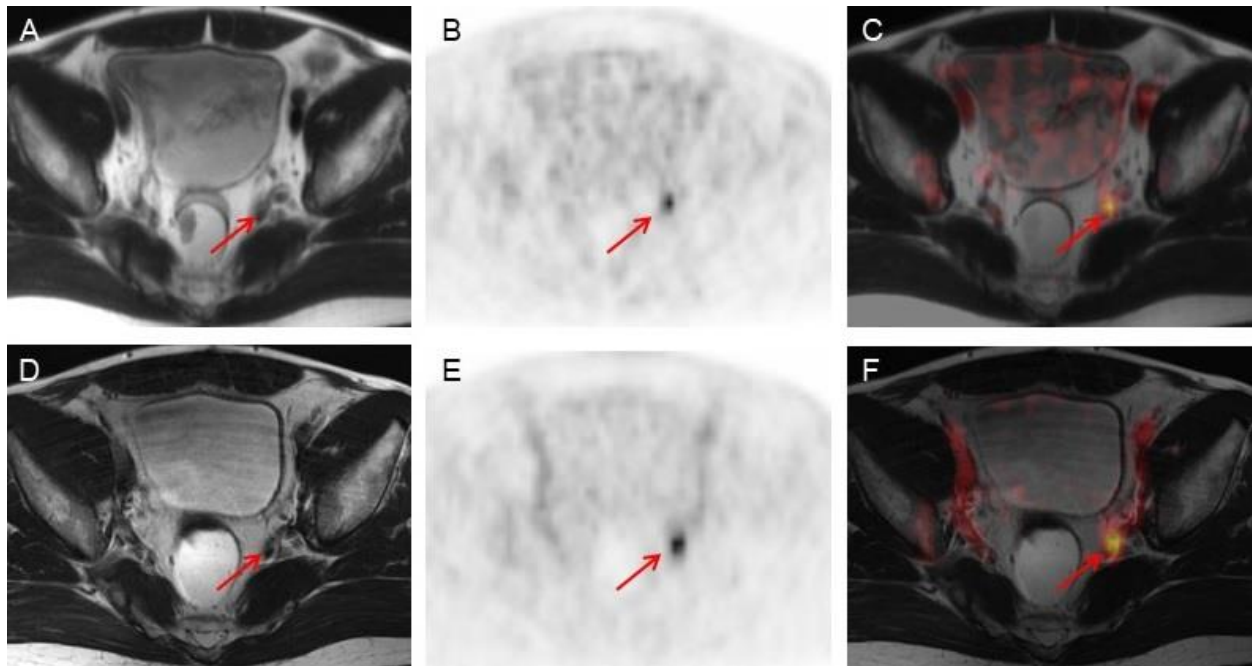

**Supplemental Fig. 1:** Pre- (lower row) and 7 months postoperative (upper row)  $^{18}\text{F}$ -rhPSMA-7 PET/MR datasets from a 61-year-old patient (Gleason Score 9, iPSA 25.98 ng/mL). Preoperative staging shows an  $^{18}\text{F}$ -rhPSMA-7-positive lymph node in the left pelvic. After surgery PSA persistence at a PSA value of 0.21 ng/ml was noted.  $^{18}\text{F}$ -rhPSMA-7 PET/MR imaging revealed the lymph node metastasis still in place which was subsequently successfully removed using PSMA-targeted radio-guided surgery.
